# Supplementary material for: Modulating the electronic structure of ultrathin layered double hydroxide nanosheets with fluorine: an efficient electrocatalyst for the oxygen evolution reaction
Source: Royal Society of Chemistry journal article supplement (doi:10.1039/c9ta03882e), 2019-01-01
Supplement: c9ta03882e1.pdf [file c9ta03882e1.pdf]

# Modulating Electronic Structure of Ultrathin Layered Double Hydroxides Nanosheets with fluorine: an Effective Electrocatalyst for Oxygen Evolution Reaction

Zhijuan Liu<sup>a,b</sup>, Chung-Li Dong<sup>c</sup>, Yu-Cheng Huang<sup>d</sup>, Jiajie Cen<sup>e</sup>, Haotian Yang<sup>e</sup>, Xiaobo Chen<sup>f</sup>, Xiao Tong<sup>b</sup>, Dong Su<sup>b</sup>, Yanyong Wang<sup>a\*</sup> and Shuangyin Wang<sup>ag\*</sup>

<sup>a</sup>State Key Laboratory of Chem/Bio-sensing and Chemometrics, College of Chemistry and Chemical Engineering, Hunan University, Changsha, 410082, China.

<sup>b</sup>Center for Functional Nanomaterials, Brookhaven National Laboratory, Upton, New York, 11973, United States.

<sup>c</sup>Department of Physics, Tamkang University, Tamsui, 251, Taiwan.

<sup>d</sup>National Synchrotron Radiation Research Center, 101 Hsin-Ann Road, Hsinchu Science Park, Hsinchu 30076, Taiwan.

<sup>d</sup>Department of Material Science and Chemical Engineering, Stony Brook University, Stony Brook, NY, United States.

<sup>e</sup>Program of Materials Science and Engineering, State University of New York at Binghamton, New York 13902, United States.

<sup>f</sup>Shenzhen Research Institute of Hunan University, Shenzhen, 518057, P.R. China.

**Synthesis of pristine Co<sub>3</sub>Fe LDHs:** Pristine Co<sub>3</sub>Fe LDHs were synthesized using a typical hydrothermal method. 0.9 M Co(NO<sub>3</sub>)<sub>2</sub>·6H<sub>2</sub>O and 0.3 M Fe(NO<sub>3</sub>)<sub>3</sub>·9H<sub>2</sub>O were dissolved in 30 mL deionized water to form solution A. 1.92 m NaOH and 0.8 m Na<sub>2</sub>CO<sub>3</sub> were dissolved in 30

mL deionized water to form solution B. Solution A and B were mixed together into a breaker under stirring. The obtained mixed solution was transferred into a stainless-steel Teflon-lined autoclave suffered by 80 °C for 48 h. The production was collected by centrifugation, washed with water and dried at 60 °C overnight.

**Synthesis of ultrathin F-Co<sub>3</sub>Fe LDHs:** 20 mg Co<sub>3</sub>Fe LDHs was dispersed into 2 mL ethanol by ultrasound. Then 1.5 mL obtained ink was dropped into 4 cm\*4 cm clean Ti foil followed by naturally drying. Put the dry Ti foil into MARCH plasma reactor. At last, the pristine Co<sub>3</sub>Fe LDHs were treated by CHF<sub>3</sub> with the flowing of 5 sccm at power of 20 W for 1 min, 5 min, 15 min and 30 min. The ultrathin F-Co<sub>3</sub>Fe LDHs was collated by stripped powder with blade.

**Electrochemical Characterization:** The OER capacity of obtained materials was test using a three-electrode system using CHI 600 electrochemical station. The catalyst ink was prepared by dispersing 4 mg materials into 500 μL deionized water and 500 μL ethanol containing 50 μL of 5 wt% Nafion under sonication for 30 min. Then 10 μL inks was dropped onto the surface of glass carbon electrode and worked as working electrode. Carbon rode and saturated calomel electrode (SCE) were used as counter electrode and the reference electrode, respectively. The electrolyte solution is 1.0 M KOH. Linear sweep voltammetry was recorded at a scan rate of 5 mVs<sup>-1</sup> with iR compensation. All potentials were referenced to a reversible hydrogen electrode (RHE) according to the equal:  $E_{RHE} = E_{SCE} + 0.242 + 0.059 \cdot \text{pH}$ . The impedance spectrum was measured at the frequency range from 0.01 Hz to 1000 kHz at 1.51 V (vs. RHE). To facilitate mass transfer, 1cm\*1cm Ni foam with same catalyst loading (50 μL inks) was also used as working electrode.

### *Characterization*

The morphology of LDHs nanosheets are investigated by scanning electron microscopy (SEM, JEOL 7600F). The bulk crystal structure of the obtained samples is characterized using powder X-ray diffraction (XRD, Bruker D8 Advance diffractometer, Cu Kα1). The phase structure of the samples was investigated using transmission electron microscopy (TEM, JEOL 2100F) and elements distribution was explored using FEI Talos 200x. The synchrotron EXAFS and XANES of Co K-edge were carried out at BL17C at National Synchrotron Radiation Research Center, Taiwan. X-ray photoelectron spectroscopy (XPS) with Al-Kα X-ray ( $h\nu = 1486.6 \text{ eV}$ ) radiation (Thermo Fisher Scientific, England) were used to explore the electronic structure. The fourier transform infrared spectroscopy (FTIR) was performed on Thermo Nicolet 6700 FT-IR. The size

and thickness of electrocatalysts were determined by atomic force microscope (AFM, Bruker Bioscope system). BET analysis was performed on JW-BK200C.

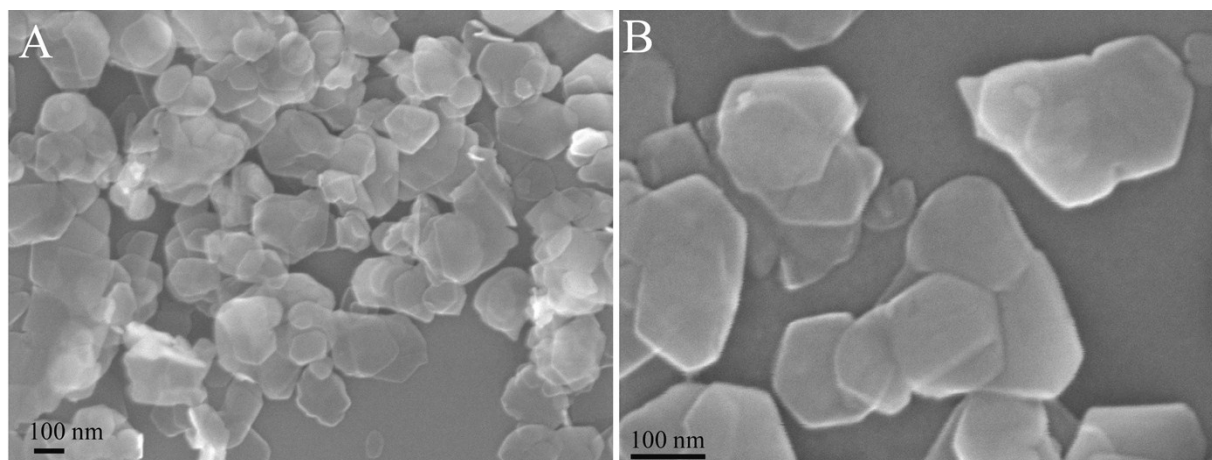

Figure S1. SEM images of pristine Co<sub>3</sub>Fe LDHs.

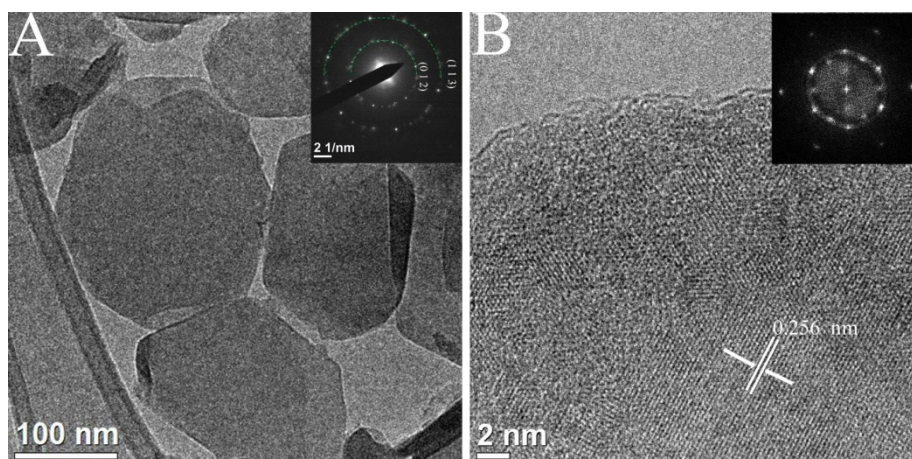

Figure S2: TEM (A) and HRTEM (B) image of pristine Co<sub>3</sub>Fe LDHs. The insert image in A is its SAED images and the insert image in B is its corresponding FFT.

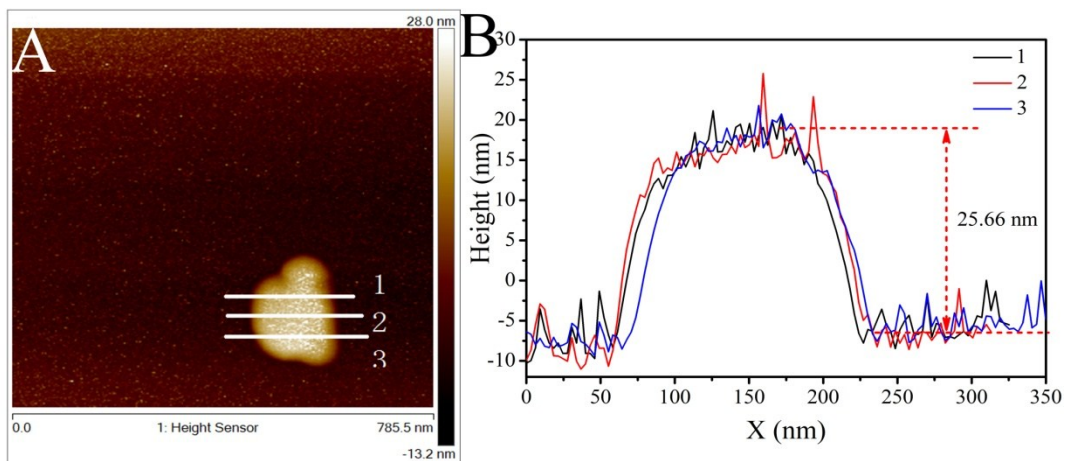

Figure S3. AFM image (A) and height curves (B) of pristine  $\text{Co}_3\text{Fe}$  LDHs.

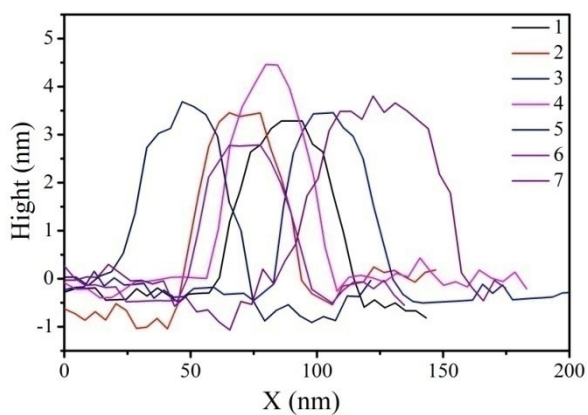

Figure S4. Height curves of F- $\text{Co}_3\text{Fe}$  LDHs.

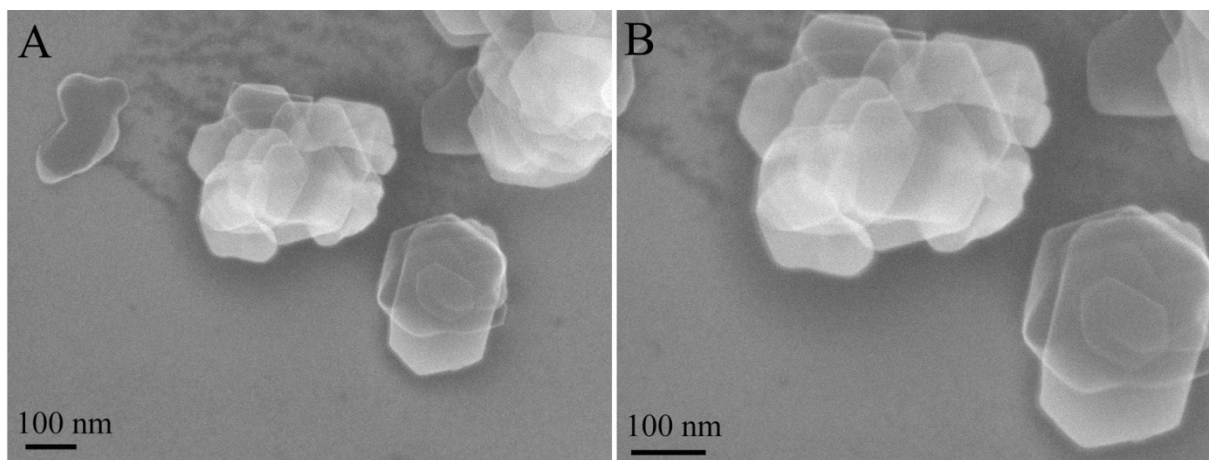

Figure S5. SEM images of  $\text{Co}_3\text{Fe}$  LDHs for  $\text{CHF}_3$ -plasma etching for 1 min.



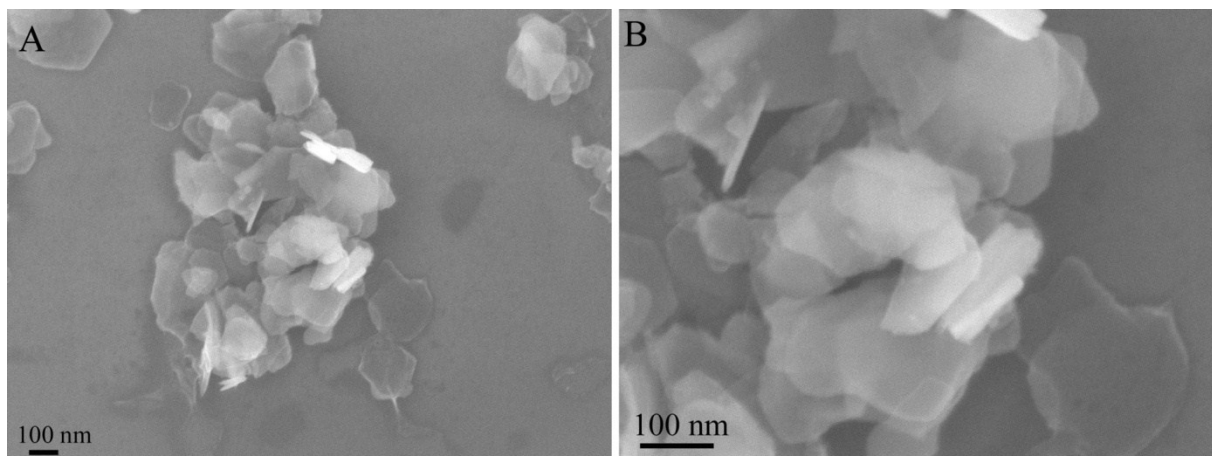

Figure S6. SEM images of Co<sub>3</sub>Fe LDHs for CHF<sub>3</sub>-plasma etching for 5 min.

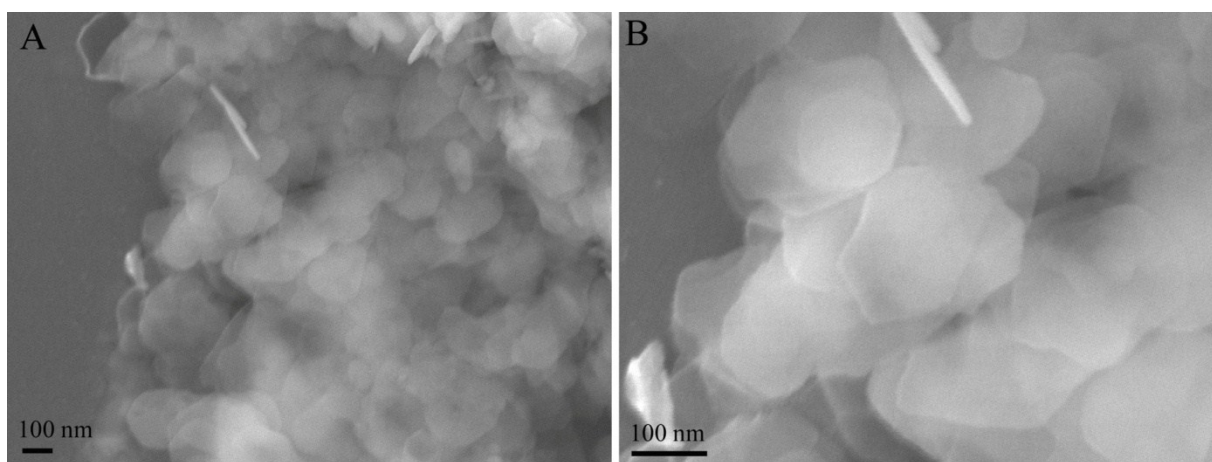

Figure S7. SEM images of Co<sub>3</sub>Fe LDHs for CHF<sub>3</sub>-plasma etching for 15 min (F-Co<sub>3</sub>Fe LDHs).

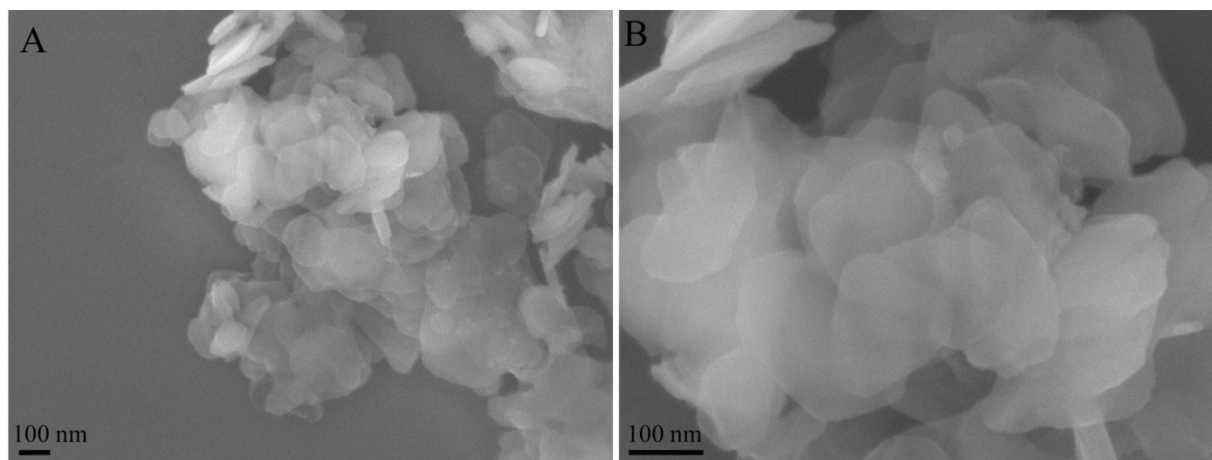

Figure S8. SEM images of Co<sub>3</sub>Fe LDHs for CHF<sub>3</sub>-plasma etching for 30 min.

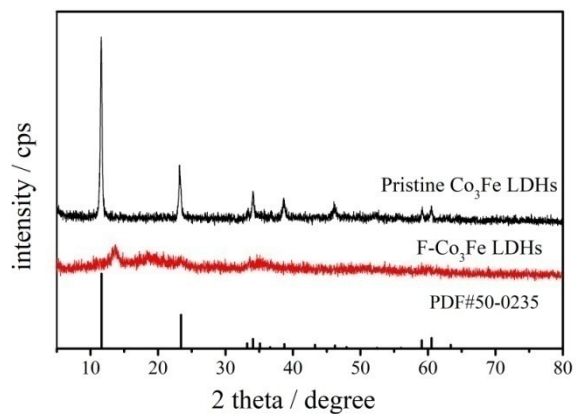

Figure S9. XRD patterns of pristine Co<sub>3</sub>Fe LDHs and F-Co<sub>3</sub>Fe LDHs.

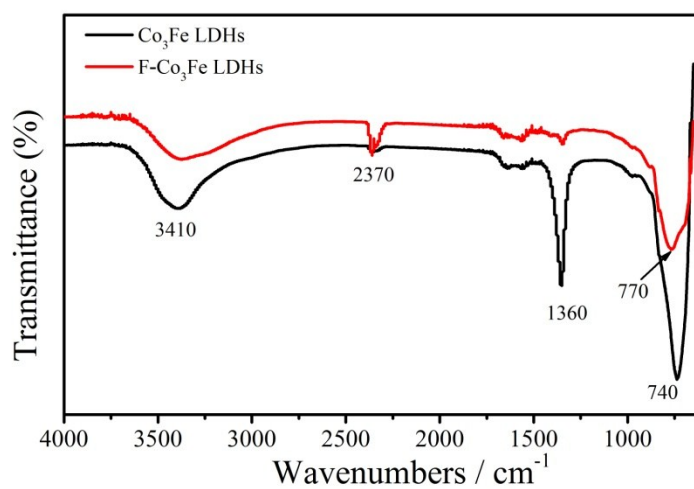

Figure S10. FT-IR image for pristine Co<sub>3</sub>Fe LDHs and F-Co<sub>3</sub>Fe LDHs.

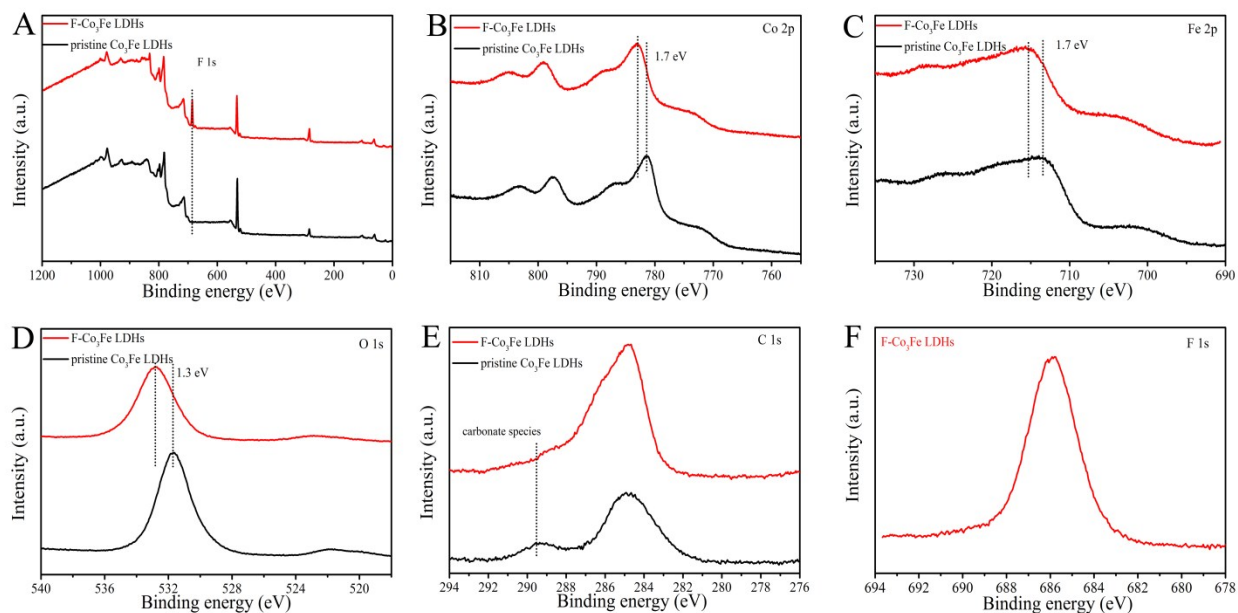

Figure S11. A) All XPS spectrum, B ) Co2p XPS spectrum, C) Fe 2p XPS spectrum, D) O 1s XPS spectrum, E) C 1s XPS spectrum and F) F 1s XPS spectrum for pristine  $\text{Co}_3\text{Fe}$  LDHs and F- $\text{Co}_3\text{Fe}$  LDHs.

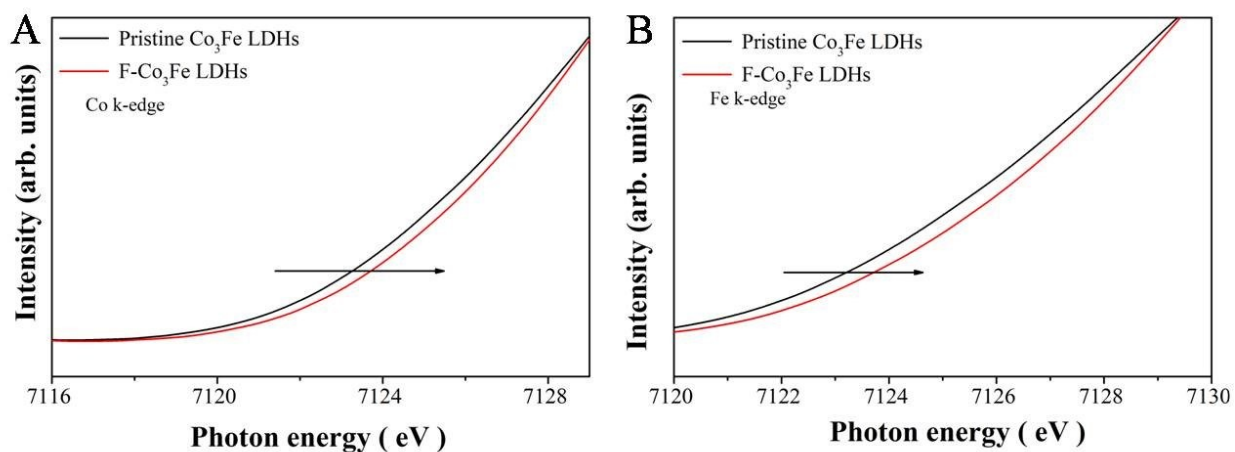

Figure S12. Magnified adsorption edge of Co k-edge (A) and Fe k-edge (B).

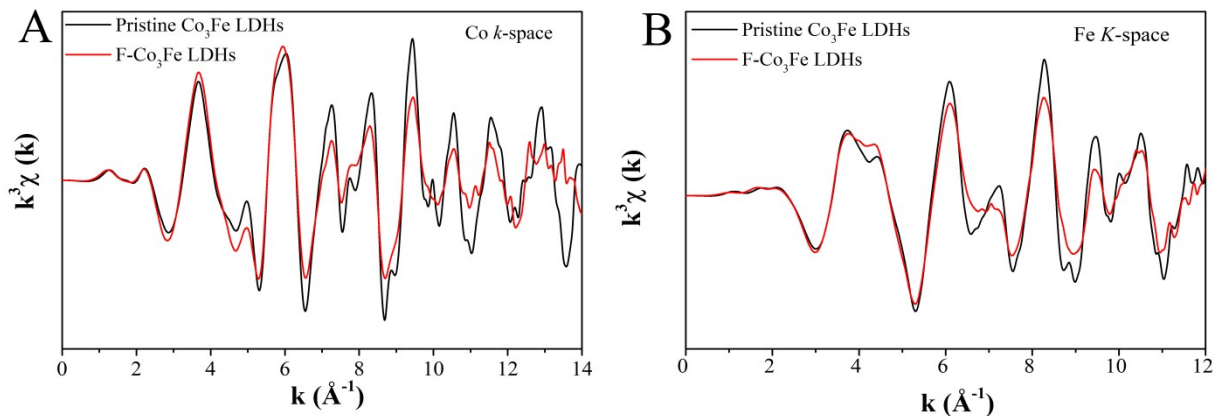

Figure S13: Co K-edge (A) and Fe K-edge (B) extended XANES oscillation functions  $k^3\chi(k)$ .

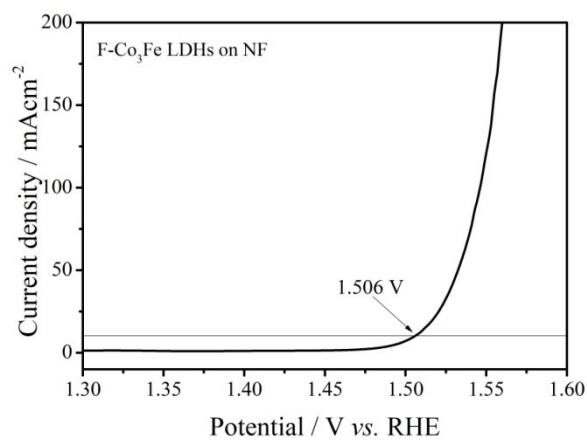

Figure S14. OER performance of F- $\text{Co}_3\text{Fe}$  LDHs on Ni foam.

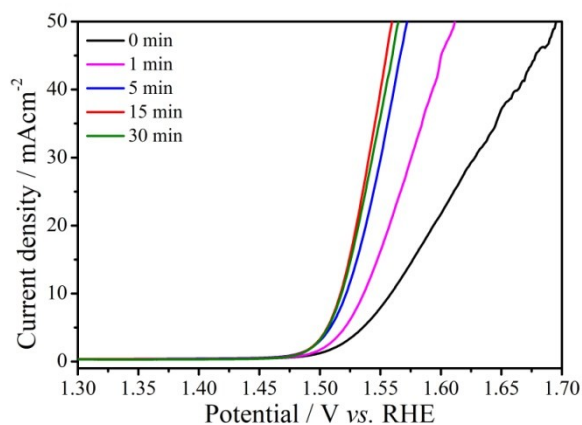

Figure S15. The OER performance of  $\text{Co}_3\text{Fe}$  LDHs that suffered from  $\text{CHF}_3$ -plasma for different time.



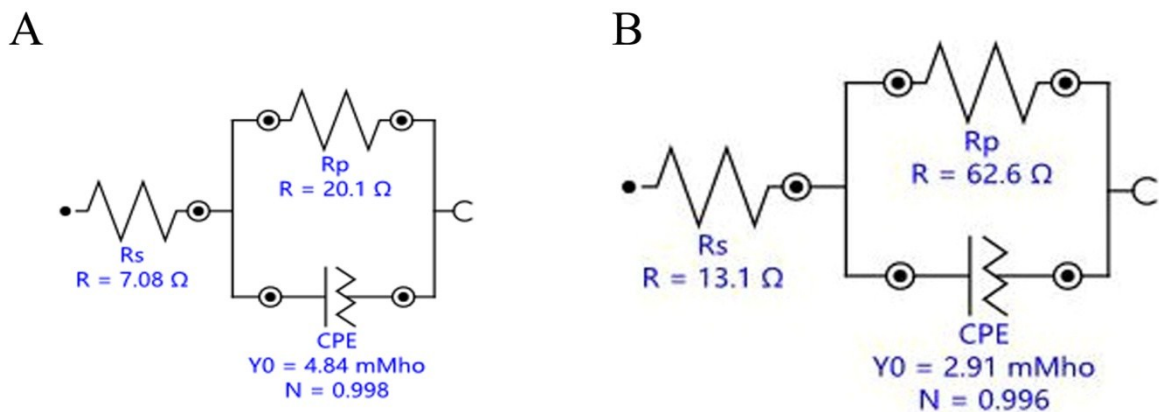

Figure S16. The equivalent circuit of pristine  $\text{Co}_3\text{Fe}$  LDHs and F- $\text{Co}_3\text{Fe}$  LDHs.

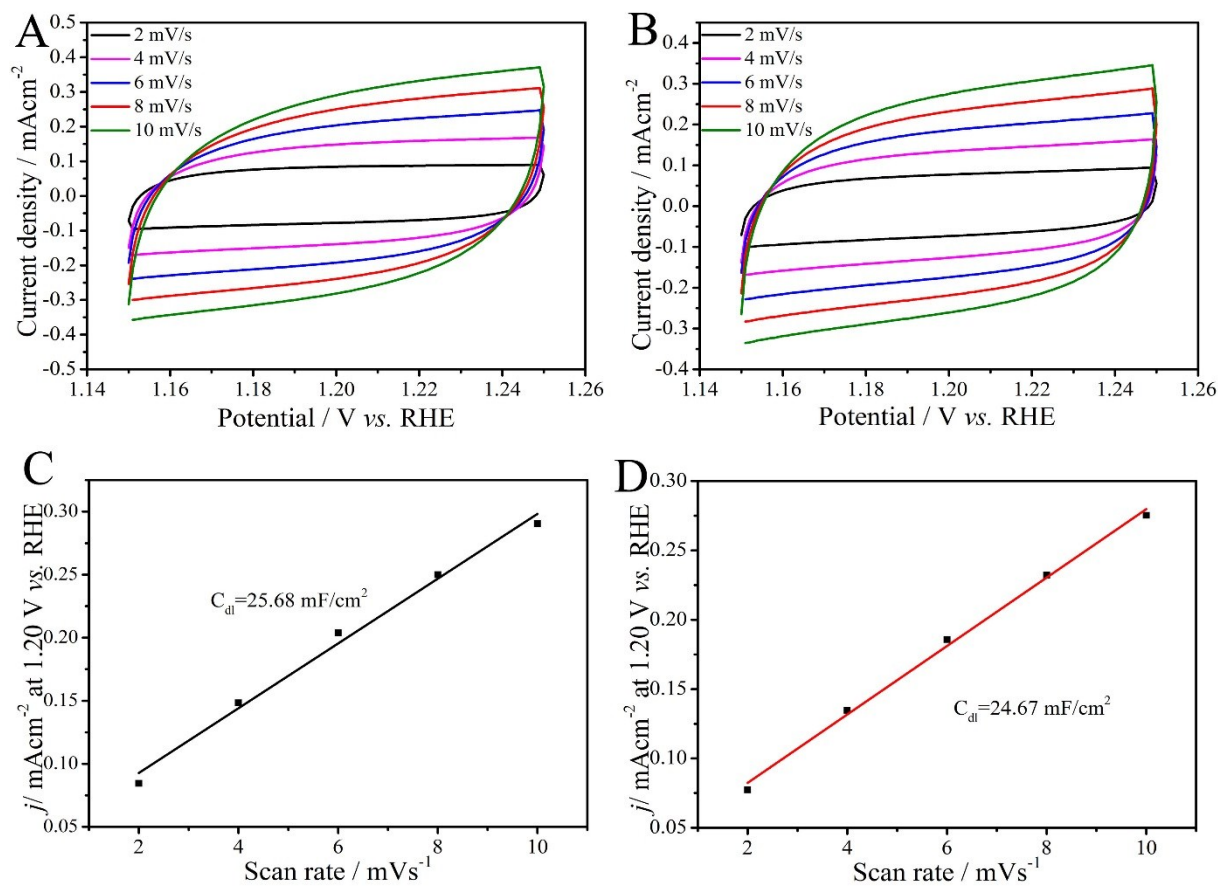

Figure S17. CV curves (A, B) and  $C_{dl}$  (C, D) for pristine  $\text{Co}_3\text{Fe}$  LDHs and F- $\text{Co}_3\text{Fe}$  LDHs, respectively.

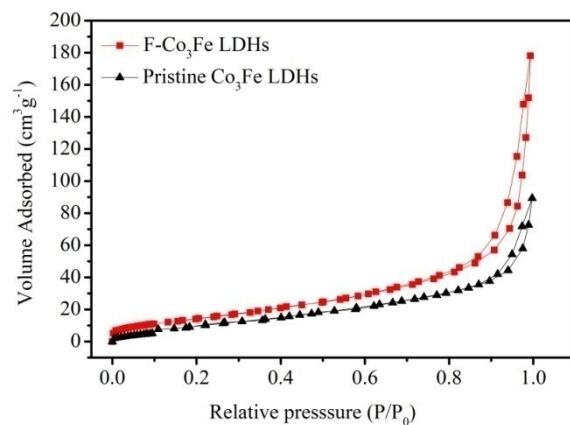

Figure S18. N<sub>2</sub> adsorption-desorption isotherms of pristine Co<sub>3</sub>Fe LDHs and F-Co<sub>3</sub>Fe LDHs.

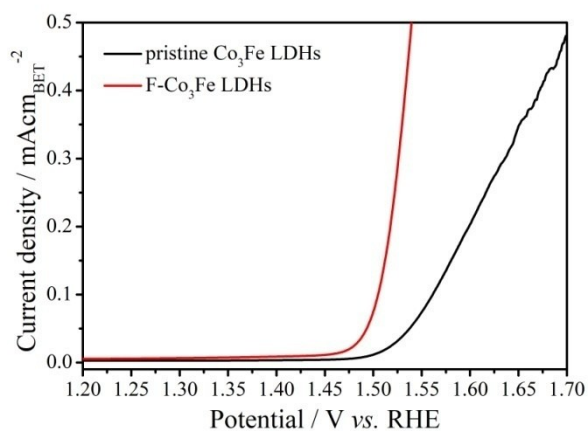

Figure S19. The LSV curves of pristine Co<sub>3</sub>Fe LDHs and F-Co<sub>3</sub>Fe LDHs after BET normalization in 1M KOH.

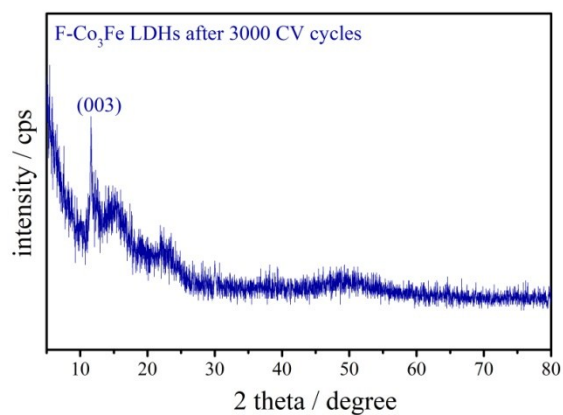

Figure S20. XRD patterns of F-Co<sub>3</sub>Fe LDHs after 3000 CV cycles.

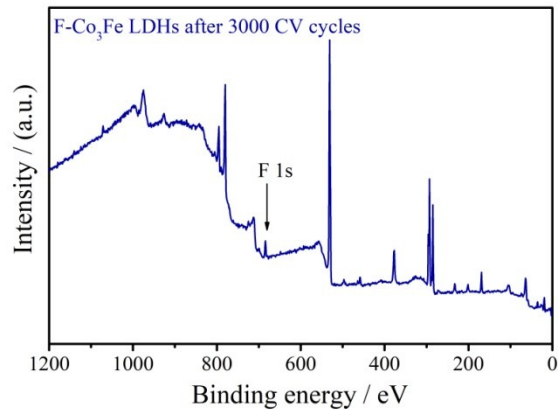

Figure S21. All XPS spectrum of F-Co<sub>3</sub>Fe LDHs after 3000 CV cycles.

Table S1. Content of Co, Fe, C, O and F element in pristine Co<sub>3</sub>Fe LDHs and F-Co<sub>3</sub>Fe LDHs.

| Content of element (atom %) | Pristine Co <sub>3</sub> Fe LDHs | F-Co <sub>3</sub> Fe LDHs |
|-----------------------------|----------------------------------|---------------------------|
| Co                          | 54.60                            | 51.50                     |
| Fe                          | 18.37                            | 17.81                     |
| O                           | 21.79                            | 15.01                     |
| C                           | 5.24                             | 6.46                      |
| F                           | 0                                | 9.21                      |

Table 2. Comparison of OER performance F-Co<sub>3</sub>Fe LDHs ultrathin nanosheets with other non-noble-metal OER electrocatalysts on glass carbon electrode in 1.0 M KOH.

| Electrocatalyst           | Overpotential at 10 mA cm <sup>-2</sup> (mV) | Tafel slope (mV/dec) | Reference    |
|---------------------------|----------------------------------------------|----------------------|--------------|
| F-Co <sub>3</sub> Fe LDHs | 287                                          | 39.17                | This work    |
| Co-LDHs-1                 | 312                                          | 68.4                 | <sup>1</sup> |
| Mono-NiTi-MMO             | 320                                          | 52                   | <sup>2</sup> |

|                                                                 |             |               |   |
|-----------------------------------------------------------------|-------------|---------------|---|
| F-doped $\alpha\text{Ni}(\text{OH})_2$                          | 325 $\pm$ 5 | 31.89 $\pm$ 2 | 3 |
| Co(OH)F                                                         | 313         | 52.8          | 4 |
| CoNi-NS/rGO                                                     | 330         | 62            | 5 |
| CoCo-LDH 2D<br>nanomesh                                         | 319         | 42            | 6 |
| $\text{Ni}_{0.75}\text{Fe}_{0.25}(\text{OH})_x$                 | 310         | 68            | 7 |
| $\text{Ni}_{0.75}\text{Fe}_{0.125}\text{V}_{0.125}\text{-LDHs}$ | 361         | 39.4          | 8 |

Table S3. Content of Co, Fe, C, O and F element in F- $\text{Co}_3\text{Fe}$  LDHs after 3000 CV cycles.

| Content of element (atom %) | F- $\text{Co}_3\text{Fe}$ LDHs after 3000 CV cycles |
|-----------------------------|-----------------------------------------------------|
| Co                          | 8.60                                                |
| Fe                          | 5.04                                                |
| O                           | 52.44                                               |
| C                           | 30.63                                               |
| F                           | 3.29                                                |

Reference:

1. L. Chen, Y. Guo, H. Wang, Z. Gu, Y. Zhang, X. Li, W. Hong and C. Duan, *Journal of Materials Chemistry A*, 2018, **6**, 10.1039.C1037TA11078B.
2. Y. Zhao, X. Jia, G. Chen, L. Shang, G. I. Waterhouse, L. Z. Wu, C. H. Tung, D. O'Hare and T. Zhang, *Journal of the American Chemical Society*, 2016, **138**, 6517-6524.
3. N. Hussain, W. Yang, J. Dou, Y. Chen, Y. Qian and L. Xu, *Journal of Materials Chemistry A*, 2019, DOI: 10.1039/C9TA01017C.
4. S. Wan, J. Qi, W. Zhang, W. Wang, S. Zhang, K. Liu, H. Zheng, J. Sun, S. Wang and R. Cao, *Advanced Materials*, 2017, **29**, 1700286.
5. T. Wang, J. Wu, Y. Liu, C. Xiao, D. Pan, J. Deng, C. Zha, E. Coy and Y. Li, *Energy Storage Materials*, 2018, S2405829718301843.
6. M. Qin, S. Li, Y. Zhao, C.-Y. Lao, Z. Zhang, L. Liu, F. Fang, H. Wu, B. Jia, Z. Liu, W. Wang, Y. Liu and X. Qu, *Advanced Energy Materials*, 2019, **9**, 1803060.
7. T. Tian, M. Zheng, J. Lin, X. Meng and Y. Ding, *Chemical Communications*, 2019, **55**, 1044-1047.
8. K. N. Dinh, P. Zheng, Z. Dai, Y. Zhang, R. Dangol, Y. Zheng, B. Li, Y. Zong and Q. Yan, *Small*, 2018, **14**, 1703257.
